# Supplementary material for: Mussel-inspired copolymer-coated polypropylene mesh with anti-adhesion efficiency for abdominal wall defect repair
Source: Royal Society of Chemistry journal article supplement (doi:10.1039/c8bm01198b), 2018-12-26
Supplement: c8bm01198b1.pdf [file c8bm01198b1.pdf]

## Supporting Information

### **Mussel-inspired copolymer coated polypropylene mesh with anti-adhesion efficiency for abdominal wall defect repair**

*Wanjun Hu*<sup>a</sup>, *Shenglin Lu*<sup>b</sup>, *Zhigang zhang*<sup>c</sup>, *Long Zhu*<sup>c</sup>, *Yazhou Wen*<sup>c</sup>, *Tianzhu Zhang*<sup>a,\*</sup>, *Zhenling Ji*<sup>c,\*</sup>

<sup>a</sup> State Key Lab of Bioelectronics, National Demonstration Center for Experimental Biomedical Engineering Education, School of Biological Science and Medical Engineering, Southeast University, Nanjing 210096, China.

<sup>b</sup> Department of General Surgery, Affiliated ZhongDa Hospital (Jiang Bei), Southeast University, Nanjing 210009, Jiangsu, China.

<sup>c</sup> Department of General Surgery, Zhongda Hospital, School of Medicine, Southeast University, Nanjing 210009, China.

#### **\*Corresponding author**

zhangtianzhu@seu.edu.cn (Tianzhu Zhang);

zlji@vip.sina.com (Zhenling Ji)

#### **Note**

Wanjun Hu and Shenglin Lu contributed to this work equally.

#### **Conflicts of interest**

All authors declare no conflicts of interest.

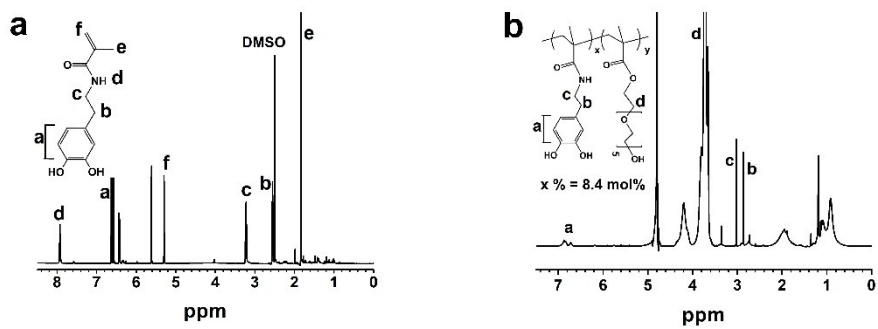

**Fig. S1.**  $^1\text{H-NMR}$  spectrum of (a) DMA and (b) PEDMA1.

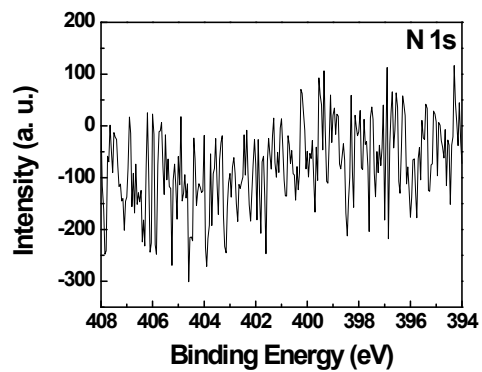

**Fig. S2.** N 1s core-level high resolution spectra of the XPS spectrum of OPP-g-PEDMA0.

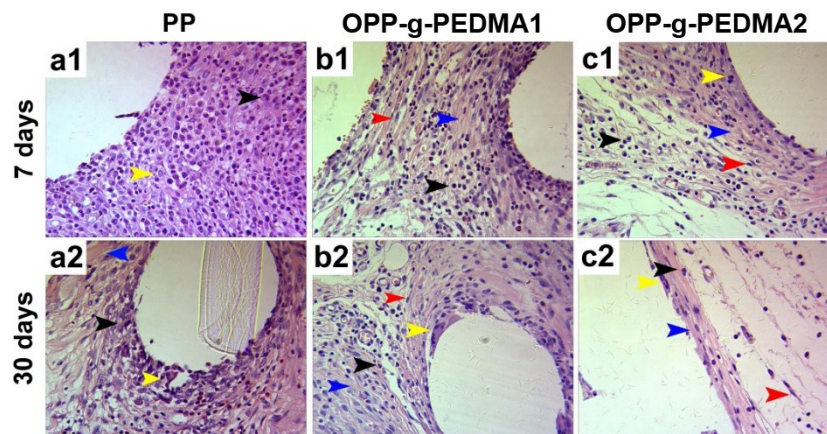

**Fig. S3.** Histopathological changes after implanted with PP (a), OPP-g-PEDMA1 (b), and OPP-g-PEDMA2 (c) meshes after 7 days (the upper panel) and 30 days (the the bottom panel) ( $\times 200$ ). a1 and a2 for PP mesh groups; b1 and b2 for OPP-g-PEDMA1 mesh groups; c1 and c2 for OPP-g-PEDMA2 mesh groups. The black arrow: Neutrophils; yellow arrow: Macrophages; blue arrow: collagen fibers; Red arrow: fibroblasts “\*” represents monofilament of polypropylene mesh.

**Table S1.** The water contact angle of native PP as well as modified PP mesh and its change.

| entry        | Content<br>PEGMA:DMA | WCA (°)     |                                                                                     |
|--------------|----------------------|-------------|-------------------------------------------------------------------------------------|
| PP           | --                   | 98.4 ± 1.1  | 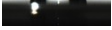 |
| OPP-g-PEDMA0 | 10:0                 | 76.2 ± 3.7* |  |
| OPP-g-PEDMA1 | 10:1                 | 62.6 ± 1.8* |  |
| OPP-g-PEDMA2 | 10:2                 | 44.8 ± 2.9* |  |

“\*” represent  $P < 0.05$

**Table S2.** Animal numbers and groups.

| groups       | 7 days | 14 days | 30 days |
|--------------|--------|---------|---------|
| PP           | 5      | 5       | 5       |
| OPP-g-PEDMA1 | 5      | 5       | 5       |
| OPP-g-PEDMA2 | 5      | 5       | 5       |

**Table S3.** Adhesion score system

| score | Area             | Adhesion grading by resistance to lysis                                                        |
|-------|------------------|------------------------------------------------------------------------------------------------|
| 0     | None             | No significant adhesions                                                                       |
| 1     | ≤ 25%            | Thin, narrow, and easily detachable adhesions                                                  |
| 2     | ≥ 25%, and ≤ 50% | Thick adhesions limited to one area                                                            |
| 3     | ≥ 50%            | Thick and broad adhesions                                                                      |
| 4     | --               | Thick and broad adhesions, involving the anterior or posterior abdominal wall, and the viscera |

**Table S4.** The adhesion area of each group.

|        | PP                      |        | OPP-g-PEDMA1            |                | OPP-g-PEDAMA2           |        |
|--------|-------------------------|--------|-------------------------|----------------|-------------------------|--------|
|        | Area (cm <sup>2</sup> ) | Area % | Area (cm <sup>2</sup> ) | Area %         | Area (cm <sup>2</sup> ) | Area % |
| 7 day  | 3.37±0.84               | ≥50%   | 1.34±0.72               | ≥25%, and ≤50% | 0.25±0.34               | ≤ 25%  |
| 14 day | 2.94±1.00               | ≥50%   | 1.95±0.85               | ≥25%, and ≤50% | 0.26±0.25               | ≤ 25%  |
| 30 day | 3.49±0.95               | ≥50%   | 1.70±0.71               | ≥25%, and ≤50% | 0.23±0.30               | ≤ 25%  |

Note: the total area is 4 cm<sup>2</sup>.
